# Supplementary material
Source: PubMed Central journal article supplement (PMC6182906)
Supplement: zam020188804s1.pdf [file zam020188804s1.pdf]

**Supplemental materials of**

**Complex iron uptake by the putrebactin-mediated and Feo systems in  
*Shewanella oneidensis***

**Lulu Liu, Shisheng Li, Sijing Wang, Ziyang Dong, and Haichun Gao\***

Institute of Microbiology and College of Life Sciences, Zhejiang University, Hangzhou, Zhejiang, 310058, China

A

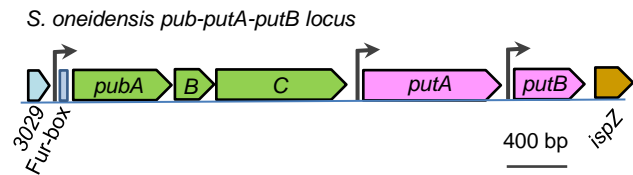

B

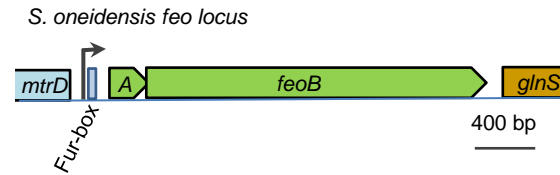

**FIG S1 Gene organization of the *putA* and *feo* locus in *S. oneidensis*.** (A) The *pub-putA-putB* locus. (B) the *feo* locus. Both loci are largely conserved in *Shewanella*. Promoters indicated by arrows are determined by the *lacZ* reporter system and Fur-boxes are given according to a published report (Fu H, Liu L, Dong Z, Guo S, Gao H. 2018. Appl Environ Microbiol 84:e00039-18, doi: 10.1128/AEM.00039-18). Drawn in scale.

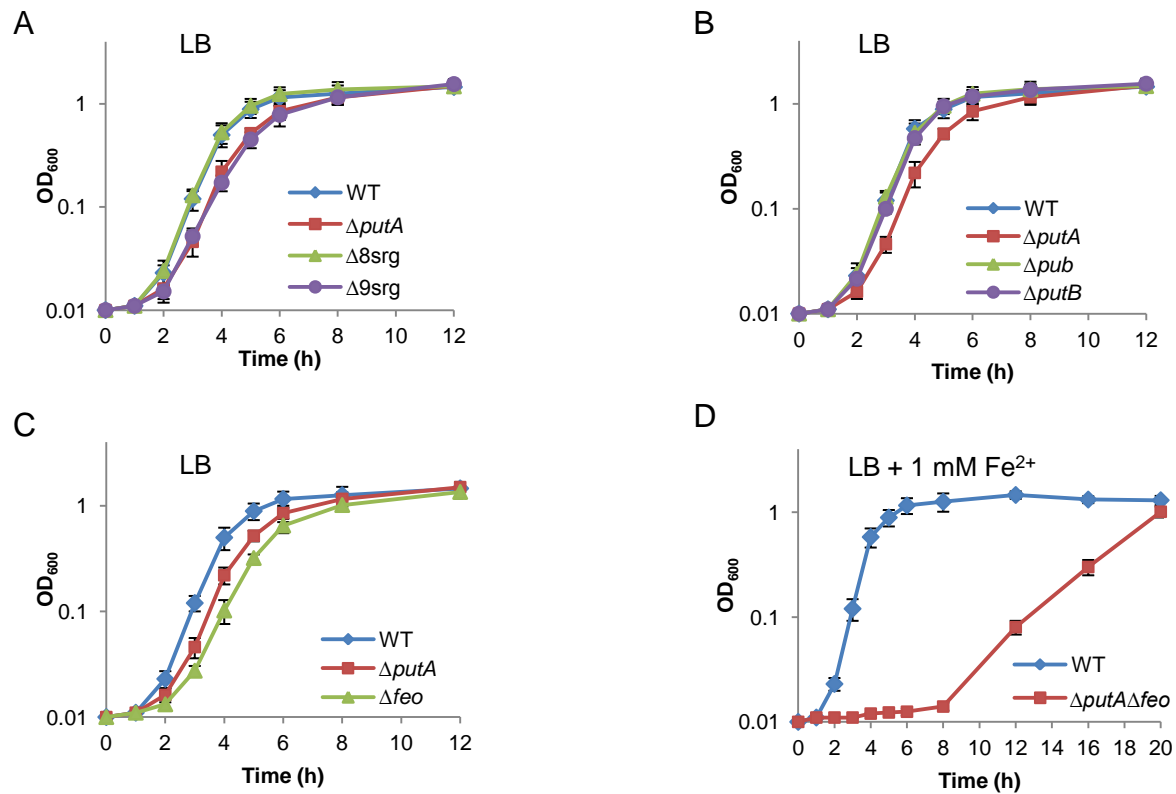

**FIG S2 Growth of indicated strains in LB.** Fresh medium indicated was inoculated with overnight cultures grown from a single colony by 1:100 dilution, and growth was determined by recording the optical density of cultures at 600 nm ( $OD_{600}$ ).  $\Delta 8srg$  and  $\Delta 9srg$ , strains lacking all TBSRs but PutA and all TBSRs, respectively. Experiments were performed at least three times and the data were presented either as means  $\pm$  SEM.

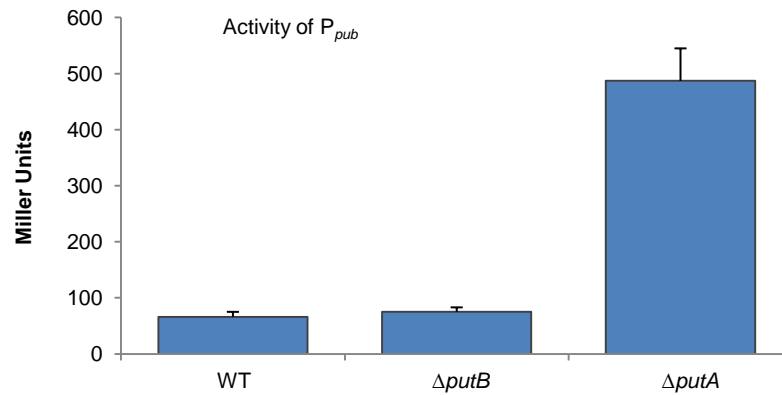

**FIG S3 Impacts of PutA and PutB depletion on expression of the *pub* operon.** Expression of the *pub* operon in the wild-type,  $\Delta putA$ , and  $\Delta putB$  strains grown in LB to the mid-log phase was analyzed by an integrative *lacZ*-reporter.

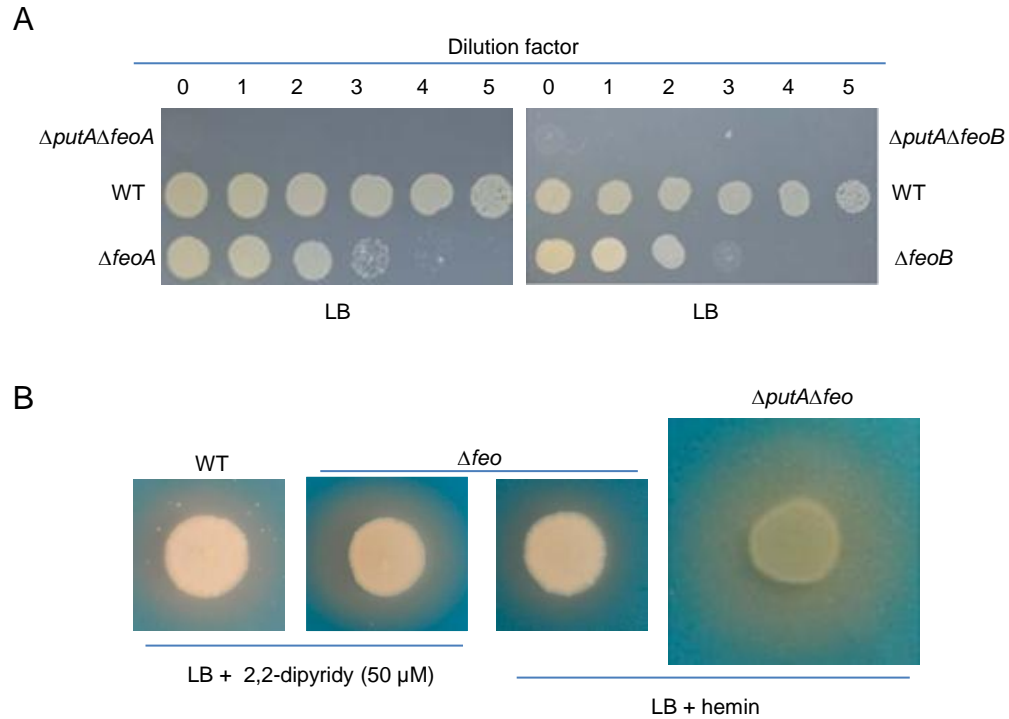

**FIG S4 Physiological impacts of *feoA* and *feoB* mutations. (A)** Growth of indicated strains on LB plates. **(B)** Siderophore production of indicated strains grown in LB with 50 μM 2,2-dipyridyl. All experiments were performed at least three times and the data were presented by a representative of similar results.

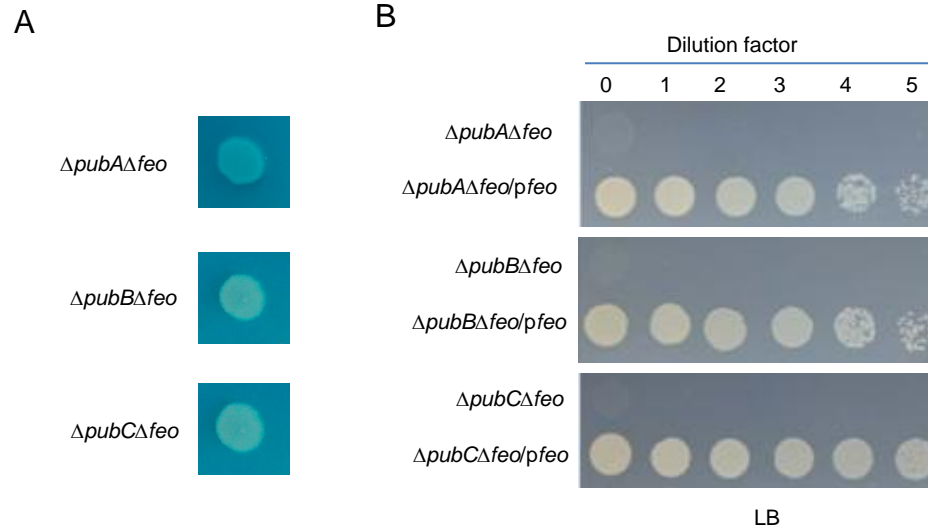

**FIG S5 Physiological impacts of *pubA*, *pubB*, and *pubC* mutations. (A)** Siderophore production of indicated strains grown in LB with 50  $\mu$ M 2,2-dipyridyl. **(B)** Growth of indicated strains on LB plates. All experiments were performed at least three times and the data were presented by a representative of similar results.

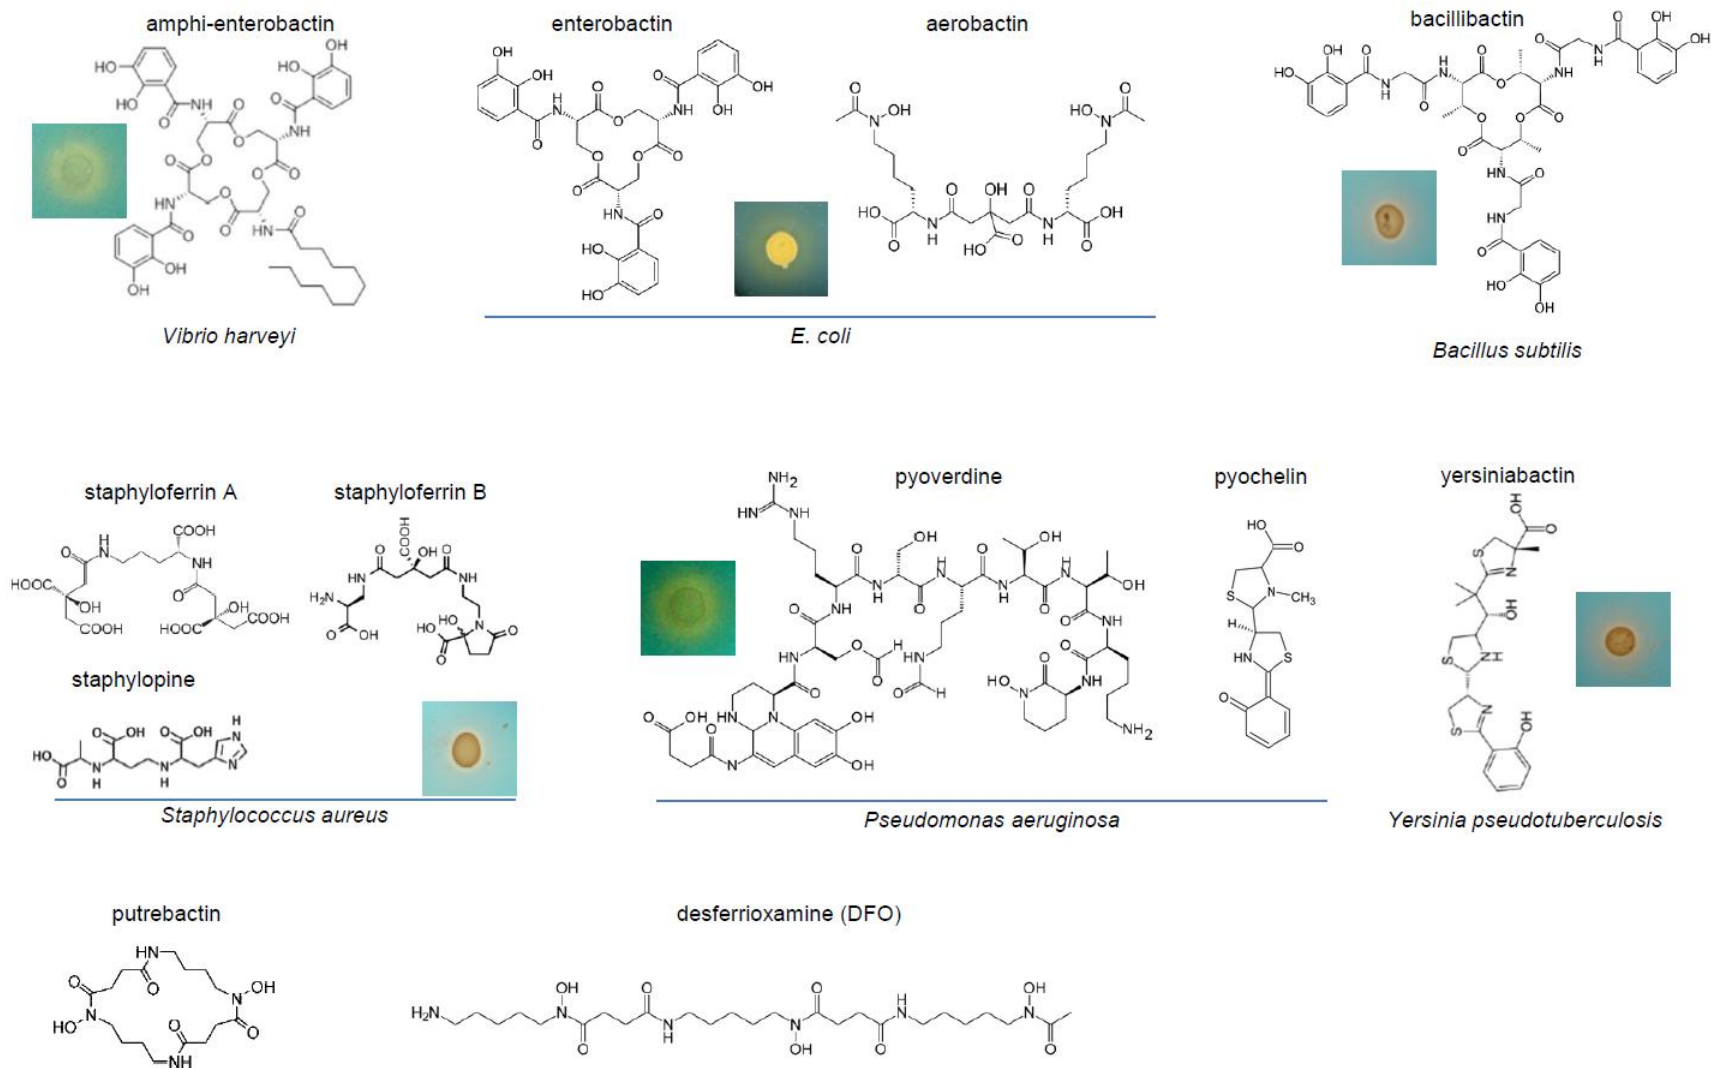

**FIG S6 Siderophores in the supernatants of the indicated bacteria.** All bacteria under test were grown in LB containing 50  $\mu$ M 2,2-dipyridyl to the stationary phase. The supernatants obtained by filtration were applied onto the CAS plates for siderophore detection. Siderophores produced by indicated bacteria are given according to published reports (Hider RC, Kong X. 2010. Nat Prod Rep 27:637-657, doi: 10.1039/B906679A; Wilson BR, Bogdan AR, Miyazawa M, Hashimoto K, Tsuji Y. 2016. Trends Mol Med 22:1077-1090, doi: 10.1016/j.molmed.2016.10.005).

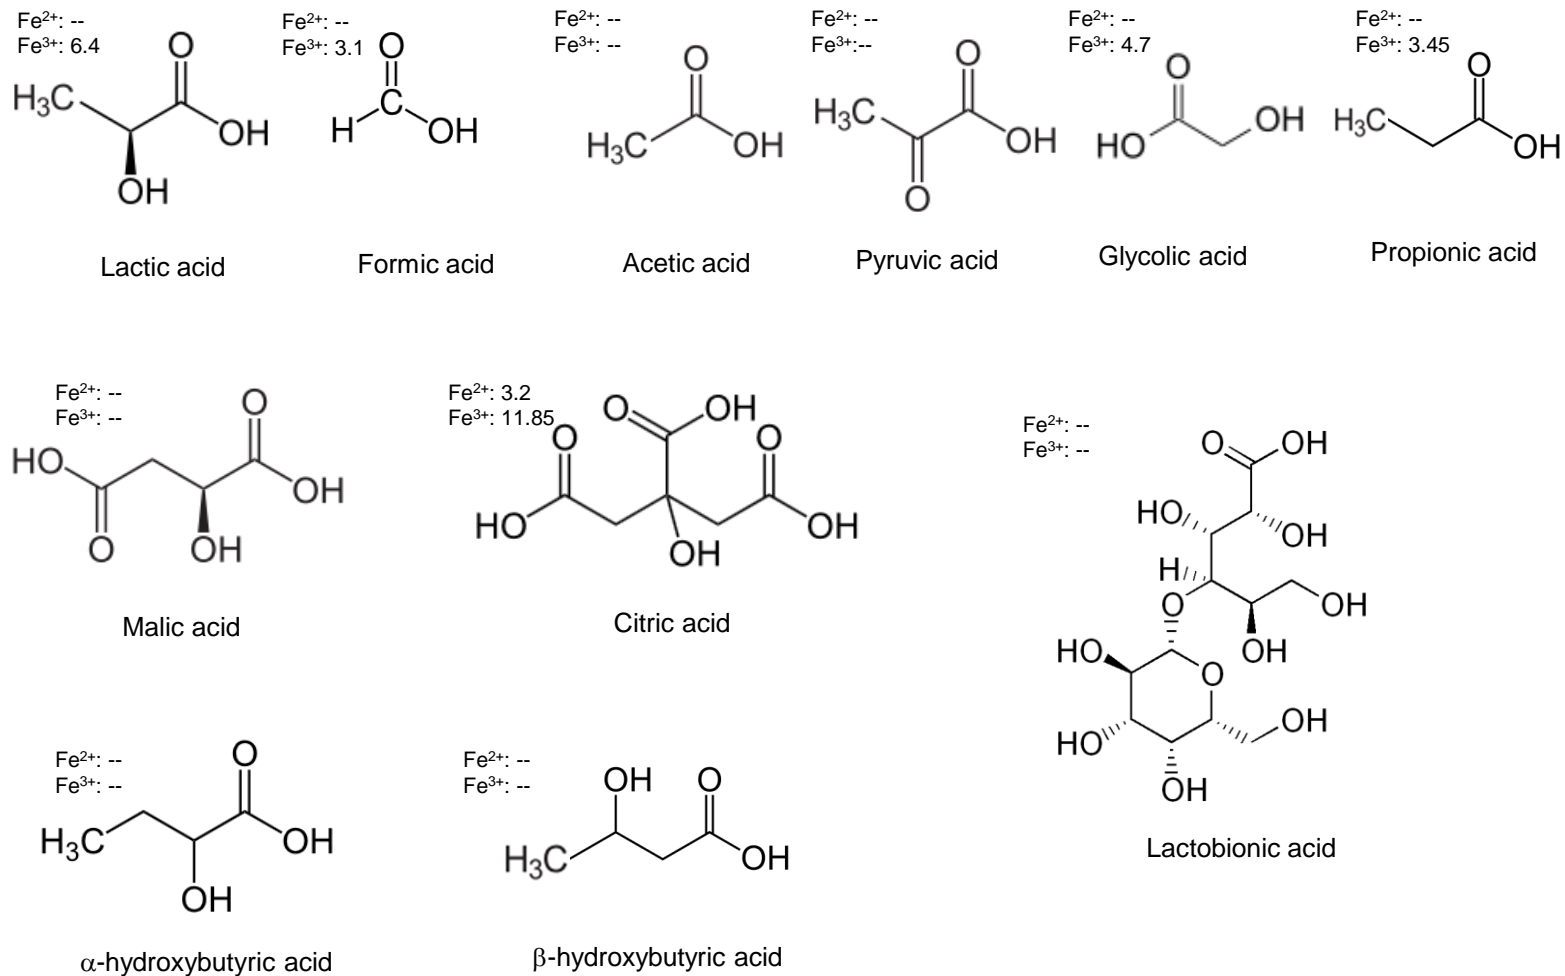

**FIG S7 Chemicals examined for their role in promoting iron uptake.** Stability constants of each chemical for  $\text{Fe}^{3+}$  and  $\text{Fe}^{2+}$  if available (Smith RM, Martell AE. 1989. Carboxylic Acids, p299-359, Critical Stability Constants: Second Supplement doi:10.1007/978-1-4615-6764-6\_12. Springer US, Boston, MA).



**TABLE S1** TonB-dependent siderophore receptors in *S. oneidensis*

| Protein        | Size (aa) | BLASTp E-value | Fur-regulation       |
|----------------|-----------|----------------|----------------------|
| PutA (SO_3033) | 730       | 0              |                      |
| SO_4743        | 706       | 5e-24          | ATAAATAAGAATTGTTTTT  |
| SO_3914        | 730       | 2e-20          | GCAAATGATAATAATTATT  |
| SO_1156        | 715       | 2e-20          |                      |
| SO_0798        | 720       | 7e-12          | GTAAATGAGAATTGTTATT  |
| SO_1482        | 815       | 3e-11          | GAGGATGGAAATCATTATC  |
| IrgA (SO_4523) | 663       | 1e-09          | GGTATTGAAAATTATTATC  |
| SO_4422        | 724       | 4e-09          | GCAAATGGTAACGATTTTTT |
| SO_4516        | 685       | 0.14           | GTAAATGATATTGGTTATC  |
